# Supplementary material for: Gαs-coupled receptor signaling and sleep regulate integrin activation of human antigen-specific T cells
Source: PubMed Central journal article supplement — J Exp Med. 2019 Mar 4;216(3):517–26. doi: 10.1084/jem.20181169 (PMC6400544; doi:10.1084/jem.20181169), 2019-03-04
Supplement: JEM_20181169_sm.pdf [file JEM_20181169_sm.pdf]

## Supplemental material

Dimitrov et al., <https://doi.org/10.1084/jem.20181169>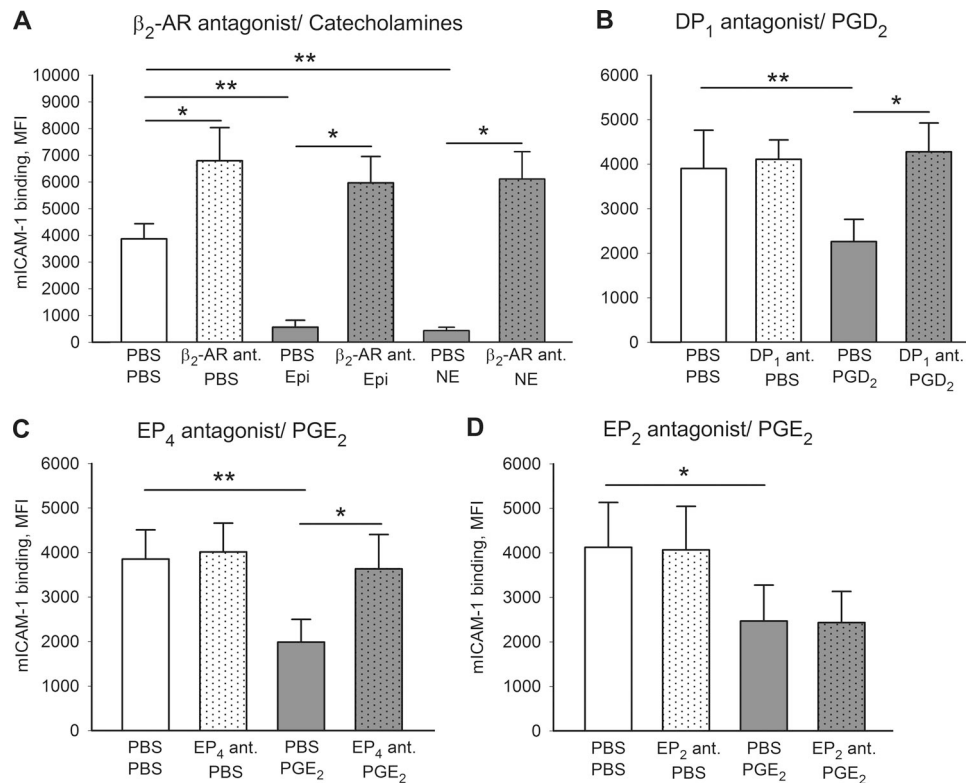

Figure S1.  $\beta_2$ -AR,  $DP_1$ , and  $EP_4$  antagonists reverse the inhibitory effect of catecholamines (epinephrine [Epi] and norepinephrine [NE]),  $PGD_2$ , and  $PGE_2$ , respectively, on TCR-induced  $\beta_2$ -integrin activation on CMV-specific  $CD8^+$  T cells. (A–D) Whole blood cells were preincubated in the presence or absence of ICI-118,551 ( $\beta_2$ -AR blocker; A), MK-0524 ( $DP_1$  receptor blocker; B), ONO-AE3-208 ( $EP_4$  receptor blocker; C), and PF-04418948 ( $EP_2$  receptor blocker; D) for 5 min, before incubation with epinephrine ( $10^{-9}$  M) or norepinephrine ( $10^{-7}$  M; A),  $PGD_2$  (1,000 pg/ml; B), and  $PGE_2$  (1,000 pg/ml; C and D) according to the indicated scheme in the figure for 5 min, followed by staining with CMV A2-NLV/PE and mICAM-1. Means  $\pm$  SEM of the MFI of mICAM-1 binding are shown. Note that the addition of ICI-118,551 alone increases integrin activation, reflecting the blockade of endogenous catecholamines. Significance is indicated for pairwise comparison between treatments using paired *t* tests. *n* = 3–4; \*, *P* < 0.05; \*\*, *P* < 0.01.

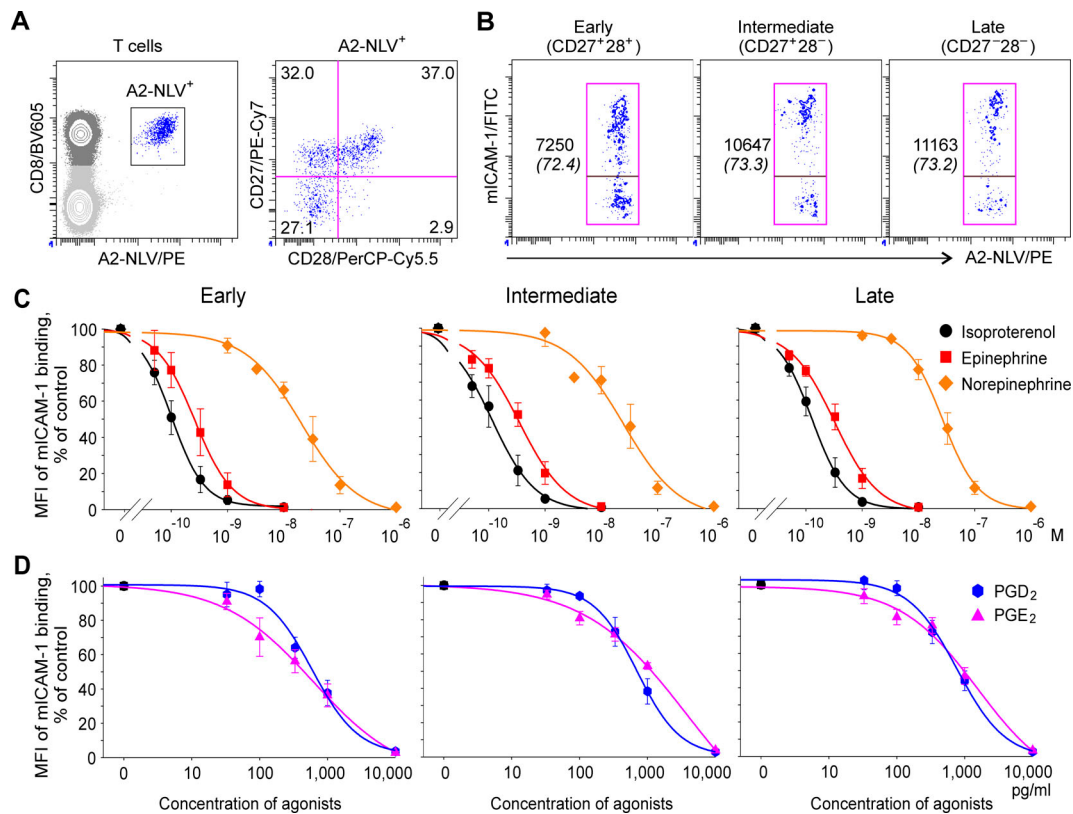

Figure S2. **Effect of  $G_{\alpha_s}$ -coupled receptor agonists on pMHC-induced  $\beta_2$ -integrin activation on CMV-specific CD8<sup>+</sup> T cell subpopulations.** Whole blood cells from the same donors as in Fig. 2 were preincubated in the presence or absence of  $G_{\alpha_s}$ -coupled receptor agonists at the indicated concentrations for 5 min followed by staining with CMV A2-NLV/PE multimers and mICAM-1 for 5 min at 37°C. **(A)** Staining with CD27 and CD28 antibodies was used to define subpopulations of pMHC<sup>+</sup> CD8<sup>+</sup> T cells. Density plots from a representative participant are shown. Numbers indicate the frequency among CMV-specific CD8<sup>+</sup> T cells. **(B)** Examples of ICAM-1 staining on early (CD27<sup>+</sup>CD28<sup>+</sup>, left), intermediate (CD27<sup>+</sup>CD28<sup>-</sup>, middle), and late (CD27<sup>-</sup>CD28<sup>-</sup>, right) differentiated CMV-specific CD8<sup>+</sup> T cells. Numbers indicate the MFI of mICAM-1 binding on CMV-specific CD8<sup>+</sup> T cells, and italic numbers in brackets indicate the frequency of mICAM-1<sup>+</sup> cells among the respective CMV-specific CD8<sup>+</sup> T cell subsets. **(C and D)** Cells were preincubated in the presence or absence of the indicated substance at the indicated concentrations for 5 min followed by staining with CMV A2-NLV/PE and mICAM-1. Means  $\pm$  SEM of the MFI of mICAM-1 binding are shown for the different agonists as percentage of the control (i.e., the sample without  $G_{\alpha_s}$ -coupled receptor agonists, which was set to 100%). The fitted standard curves were calculated by nonlinear regression (see Table 1 for EC<sub>50</sub> values).  $n = 5$ .
